# Supplementary material
Source: publisher site journal article supplement (https://www.dovepress.com/article/357638)
Supplement: Supplementary file 1 [file get_supplementary_file.php]

| #term ID | term description                                     | observed gene count | background gene count | strength | false discovery rate |
|----------|------------------------------------------------------|---------------------|-----------------------|----------|----------------------|
| hsa04750 | Inflammatory mediator regulation of TRP              | 9                   | 92                    | 2.2      | 5.15E-17             |
| hsa04066 | HIF-1 signaling pathway                              | 8                   | 98                    | 2.12     | 8.69E-15             |
| hsa04666 | Fc gamma R-mediated phagocytosis                     | 8                   | 89                    | 2.17     | 8.69E-15             |
| hsa04933 | AGE-RAGE signaling pathway in diabetic complications | 8                   | 98                    | 2.12     | 8.69E-15             |
| hsa04960 | Aldosterone-regulated sodium reabsorption            | 7                   | 37                    | 2.49     | 8.69E-15             |
| hsa05146 | Amoebiasis                                           | 8                   | 94                    | 2.14     | 8.69E-15             |
| hsa04930 | Type II diabetes mellitus                            | 7                   | 46                    | 2.39     | 1.04E-14             |
| hsa04725 | Cholinergic synapse                                  | 8                   | 111                   | 2.07     | 1.17E-14             |
| hsa04071 | Sphingolipid signaling pathway                       | 8                   | 116                   | 2.05     | 1.46E-14             |
| hsa04370 | VEGF signaling pathway                               | 7                   | 59                    | 2.29     | 3.68E-14             |
| hsa05161 | Hepatitis B                                          | 8                   | 142                   | 1.96     | 5.69E-14             |
| hsa04072 | Phospholipase D signaling pathway                    | 8                   | 145                   | 1.95     | 6.13E-14             |
| hsa04664 | Fc epsilon RI signaling pathway                      | 7                   | 67                    | 2.23     | 6.13E-14             |
| hsa05223 | Non-small cell lung cancer                           | 7                   | 66                    | 2.24     | 6.13E-14             |
| hsa05214 | Glioma                                               | 7                   | 68                    | 2.22     | 6.24E-14             |
| hsa01521 | EGFR tyrosine kinase inhibitor resistance            | 7                   | 78                    | 2.17     | 1.44E-13             |
| hsa05164 | Influenza A                                          | 8                   | 168                   | 1.89     | 1.44E-13             |
| hsa04012 | ErbB signaling pathway                               | 7                   | 83                    | 2.14     | 1.95E-13             |
| hsa04151 | PI3K-Akt signaling pathway                           | 9                   | 348                   | 1.62     | 2.94E-13             |
| hsa05205 | Proteoglycans in cancer                              | 8                   | 195                   | 1.83     | 3.67E-13             |
| hsa04070 | Phosphatidylinositol signaling system                | 7                   | 97                    | 2.07     | 4.74E-13             |
| hsa05231 | Choline metabolism in cancer                         | 7                   | 98                    | 2.07     | 4.84E-13             |
| hsa05142 | Chagas disease (American trypanosomiasis)            | 7                   | 101                   | 2.05     | 5.67E-13             |
| hsa04620 | Toll-like receptor signaling pathway                 | 7                   | 102                   | 2.05     | 5.81E-13             |
| hsa04931 | Insulin resistance                                   | 7                   | 107                   | 2.03     | 7.58E-13             |
| hsa04973 | Carbohydrate digestion and absorption                | 6                   | 42                    | 2.37     | 7.58E-13             |
| hsa04670 | Leukocyte transendothelial migration                 | 7                   | 112                   | 2.01     | 9.68E-13             |
| hsa04919 | Thyroid hormone signaling pathway                    | 7                   | 115                   | 2        | 1.12E-12             |
| hsa04611 | Platelet activation                                  | 7                   | 123                   | 1.97     | 1.70E-12             |
| hsa04650 | Natural killer cell mediated cytotoxicity            | 7                   | 124                   | 1.96     | 1.73E-12             |
| hsa04923 | Regulation of lipolysis in adipocytes                | 6                   | 53                    | 2.27     | 2.24E-12             |
| hsa04926 | Relaxin signaling pathway                            | 7                   | 130                   | 1.94     | 2.24E-12             |
| hsa05162 | Measles                                              | 7                   | 133                   | 1.93     | 2.53E-12             |
| hsa05213 | Endometrial cancer                                   | 6                   | 58                    | 2.23     | 3.39E-12             |
| hsa04213 | Longevity regulating pathway - multiple species      | 6                   | 61                    | 2.21     | 4.38E-12             |
| hsa04150 | mTOR signaling pathway                               | 7                   | 148                   | 1.89     | 4.78E-12             |
| hsa05230 | Central carbon metabolism in cancer                  | 6                   | 65                    | 2.18     | 5.94E-12             |
| hsa05221 | Acute myeloid leukemia                               | 6                   | 66                    | 2.17     | 6.31E-12             |
| hsa05211 | Renal cell carcinoma                                 | 6                   | 68                    | 2.16     | 7.28E-12             |
| hsa04917 | Prolactin signaling pathway                          | 6                   | 69                    | 2.15     | 7.71E-12             |
| hsa01524 | Platinum drug resistance                             | 6                   | 70                    | 2.15     | 8.08E-12             |
| hsa05225 | Hepatocellular carcinoma                             | 7                   | 163                   | 1.85     | 8.08E-12             |
| hsa04662 | B cell receptor signaling pathway                    | 6                   | 71                    | 2.14     | 8.45E-12             |
| hsa05100 | Bacterial invasion of epithelial cells               | 6                   | 72                    | 2.13     | 8.94E-12             |
| hsa05218 | Melanoma                                             | 6                   | 72                    | 2.13     | 8.94E-12             |

|          |                                                          |   |     |      |          |
|----------|----------------------------------------------------------|---|-----|------|----------|
| hsa05212 | Pancreatic cancer                                        | 6 | 74  | 2.12 | 1.00E-11 |
| hsa04360 | Axon guidance                                            | 7 | 173 | 1.82 | 1.06E-11 |
| hsa05220 | Chronic myeloid leukemia                                 | 6 | 76  | 2.11 | 1.12E-11 |
| hsa05167 | Kaposi's sarcoma-associated herpesvirus infection        | 7 | 183 | 1.79 | 1.49E-11 |
| hsa05210 | Colorectal cancer                                        | 6 | 85  | 2.06 | 2.03E-11 |
| hsa04510 | Focal adhesion                                           | 7 | 197 | 1.76 | 2.36E-11 |
| hsa04211 | Longevity regulating pathway                             | 6 | 88  | 2.05 | 2.39E-11 |
| hsa04015 | Rap1 signaling pathway                                   | 7 | 203 | 1.75 | 2.79E-11 |
| hsa05222 | Small cell lung cancer                                   | 6 | 92  | 2.03 | 2.97E-11 |
| hsa04914 | Progesterone-mediated oocyte maturation                  | 6 | 94  | 2.02 | 3.30E-11 |
| hsa01522 | Endocrine resistance                                     | 6 | 95  | 2.01 | 3.44E-11 |
| hsa05215 | Prostate cancer                                          | 6 | 97  | 2    | 3.82E-11 |
| hsa04660 | T cell receptor signaling pathway                        | 6 | 99  | 1.99 | 4.22E-11 |
| hsa04014 | Ras signaling pathway                                    | 7 | 228 | 1.7  | 5.53E-11 |
| hsa04668 | TNF signaling pathway                                    | 6 | 108 | 1.96 | 6.74E-11 |
| hsa04722 | Neurotrophin signaling pathway                           | 6 | 116 | 1.93 | 1.00E-10 |
| hsa04152 | AMPK signaling pathway                                   | 6 | 120 | 1.91 | 1.20E-10 |
| hsa04380 | Osteoclast differentiation                               | 6 | 124 | 1.9  | 1.43E-10 |
| hsa04140 | Autophagy - animal                                       | 6 | 125 | 1.89 | 1.47E-10 |
| hsa04068 | FoxO signaling pathway                                   | 6 | 130 | 1.88 | 1.82E-10 |
| hsa05160 | Hepatitis C                                              | 6 | 131 | 1.87 | 1.88E-10 |
| hsa04915 | Estrogen signaling pathway                               | 6 | 133 | 1.87 | 2.02E-10 |
| hsa05418 | Fluid shear stress and atherosclerosis                   | 6 | 133 | 1.87 | 2.02E-10 |
| hsa04910 | Insulin signaling pathway                                | 6 | 134 | 1.86 | 2.05E-10 |
| hsa04210 | Apoptosis                                                | 6 | 135 | 1.86 | 2.11E-10 |
| hsa04550 | Signaling pathways regulating pluripotency of stem cells | 6 | 138 | 1.85 | 2.36E-10 |
| hsa05224 | Breast cancer                                            | 6 | 147 | 1.82 | 3.36E-10 |
| hsa05226 | Gastric cancer                                           | 6 | 147 | 1.82 | 3.36E-10 |
| hsa04932 | Non-alcoholic fatty liver disease (NAFLD)                | 6 | 149 | 1.82 | 3.54E-10 |
| hsa04218 | Cellular senescence                                      | 6 | 156 | 1.8  | 4.57E-10 |
| hsa04630 | Jak-STAT signaling pathway                               | 6 | 160 | 1.79 | 5.22E-10 |
| hsa04062 | Chemokine signaling pathway                              | 6 | 181 | 1.73 | 1.06E-09 |
| hsa05203 | Viral carcinogenesis                                     | 6 | 183 | 1.73 | 1.11E-09 |
| hsa05169 | Epstein-Barr virus infection                             | 6 | 194 | 1.7  | 1.55E-09 |
| hsa04024 | cAMP signaling pathway                                   | 6 | 195 | 1.7  | 1.57E-09 |
| hsa04810 | Regulation of actin cytoskeleton                         | 6 | 205 | 1.68 | 2.08E-09 |
| hsa05166 | HTLV-I infection                                         | 6 | 250 | 1.59 | 6.57E-09 |
| hsa05200 | Pathways in cancer                                       | 7 | 515 | 1.35 | 1.03E-08 |
| hsa05165 | Human papillomavirus infection                           | 6 | 317 | 1.49 | 2.57E-08 |
| hsa00562 | Inositol phosphate metabolism                            | 4 | 73  | 1.95 | 1.66E-07 |
| hsa05206 | MicroRNAs in cancer                                      | 4 | 149 | 1.64 | 2.59E-06 |
| hsa05143 | African trypanosomiasis                                  | 2 | 34  | 1.98 | 0.00033  |
| hsa05130 | Pathogenic Escherichia coli infection                    | 2 | 53  | 1.79 | 0.00075  |
| hsa04925 | Aldosterone synthesis and secretion                      | 2 | 93  | 1.54 | 0.0022   |
| hsa05145 | Toxoplasmosis                                            | 2 | 109 | 1.48 | 0.003    |
| hsa04270 | Vascular smooth muscle contraction                       | 2 | 119 | 1.44 | 0.0035   |
| hsa04371 | Apelin signaling pathway                                 | 2 | 133 | 1.39 | 0.0043   |
| hsa04261 | Adrenergic signaling in cardiomyocytes                   | 2 | 139 | 1.37 | 0.0046   |

|                 |                            |   |     |      |        |
|-----------------|----------------------------|---|-----|------|--------|
| <b>hsa04921</b> | Oxytocin signaling pathway | 2 | 149 | 1.34 | 0.0052 |
| <b>hsa04022</b> | cGMP-PKG signaling pathway | 2 | 160 | 1.31 | 0.0059 |
